# Supplementary material for: Associations of Less Healthy Snack Food Consumption with Infant Weight-for-Length Z-Score Trajectories: Findings from the Nurture Cohort Study
Source: PubMed Central journal article supplement (PMC6893797; doi:10.3390/nu11112752), 2019-11-13
Supplement: nutrients-11-02752-s001.pdf [file nutrients-11-02752-s001.pdf]

**Table S1.** Bivariate correlations between foods and sugar-sweetened beverages (SSB) consumed by infants from 4 to 12 months.

|                          | Baby Snacks <sup>a</sup> | Sweets <sup>b</sup> | SSB <sup>c</sup> | Fruits  | Vegetables | Dairy <sup>d</sup> | Protein <sup>e</sup> | Grains <sup>f</sup> | Breastmilk | Formula |
|--------------------------|--------------------------|---------------------|------------------|---------|------------|--------------------|----------------------|---------------------|------------|---------|
| Baby snacks <sup>a</sup> | –                        |                     |                  |         |            |                    |                      |                     |            |         |
| Sweets <sup>b</sup>      | 0.30 *                   | –                   |                  |         |            |                    |                      |                     |            |         |
| SSB <sup>c</sup>         | 0.17 **                  | 0.48 *              | –                |         |            |                    |                      |                     |            |         |
| Fruits                   | 0.43 *                   | 0.23 *              | 0.07             | –       |            |                    |                      |                     |            |         |
| Vegetables               | 0.41 *                   | 0.22 *              | 0.13 **          | 0.78 *  | –          |                    |                      |                     |            |         |
| Dairy <sup>d</sup>       | 0.39 *                   | 0.37 *              | 0.24 *           | 0.42 *  | 0.44 *     | –                  |                      |                     |            |         |
| Protein <sup>e</sup>     | 0.39 *                   | 0.49 *              | 0.29 *           | 0.43 *  | 0.47 *     | 0.53 *             | –                    |                     |            |         |
| Grains <sup>f</sup>      | 0.47 *                   | 0.31 *              | 0.27 *           | 0.35 ** | 0.40 *     | 0.29 *             | 0.37 *               | –                   |            |         |
| Breastmilk               | -0.16 **                 | -0.12 **            | -0.27 **         | 0.01    | 0.04       | 0.08               | -0.04                | -0.26 *             | –          |         |
| Formula                  | 0.03                     | 0.06                | 0.08 *           | -0.06   | -0.05      | -0.17 *            | -0.18 *              | 0.15 **             | -0.63 *    | –       |

<sup>a</sup> Includes teething biscuits, puffs, and melts. <sup>b</sup> Includes cakes, cookies, and candies. <sup>c</sup> Includes juice drinks, soda, or sweeten tea. <sup>d</sup> Includes yogurt and cheese. <sup>e</sup> Includes meat, fish and eggs. <sup>f</sup> Includes breakfast cereal, crackers, bread, pasta, rice, and infant cereal. \*\*  $p < 0.05$ , \*  $p < 0.001$
